# Supplementary material for: Risk prediction models for dementia constructed by supervised principal component analysis using miRNA expression data
Source: PubMed Central journal article supplement (PMC6389908; doi:10.1038/s42003-019-0324-7), 2019-02-25
Supplement: 42003_2019_324_MOESM1_ESM.pdf [file 42003_2019_324_MOESM1_ESM.pdf]

**Supplementary Table 1. Risk prediction models using larger maximum value of PC scores (m=50)**

| Max #PCs | disease | *T  | †m | #miRNAs | AUC              |                   |
|----------|---------|-----|----|---------|------------------|-------------------|
|          |         |     |    |         | discovery cohort | validation cohort |
| 10       | AD      | 4.5 | 10 | 78      | 0.877            | 0.874             |
|          | VaD     | 4   | 10 | 86      | 0.923            | 0.867             |
|          | DLB     | 3.4 | 9  | 110     | 0.885            | 0.870             |
| 50       | AD      | 3.6 | 41 | 171     | 0.900            | 0.881             |
|          | VaD     | 3.8 | 13 | 134     | 0.935            | 0.852             |
|          | DLB     | 3.2 | 12 | 143     | 0.893            | 0.872             |

\*T: cutoff value of the z-value in the logistic regression

†m: the number of top PC scores used for the prediction models

**Supplementary Table 2. Risk prediction models using all miRNAs**

| Max #PCs | disease | Using pre-selected miRNAs |       | Using all miRNAs |       |
|----------|---------|---------------------------|-------|------------------|-------|
|          |         | †m                        | AUC   | †m               | AUC   |
| 10       | AD      | 10                        | 0.877 | 10               | 0.862 |
|          | VaD     | 10                        | 0.923 | 8                | 0.876 |
|          | DLB     | 9                         | 0.885 | 10               | 0.846 |
| 50       | AD      | 41                        | 0.900 | 48               | 0.883 |
|          | VaD     | 14                        | 0.920 | 8                | 0.876 |
|          | DLB     | 12                        | 0.893 | 20               | 0.863 |

†m: the number of top PC scores used for the prediction models
